# Supplementary material for: Novel Characteristics of Race-Specific Genetic Functions in Korean CADASIL
Source: MDPI journal article supplement (doi:10.3390/medicina55090521), 2019-08-22
Supplement: s1 [file s1]

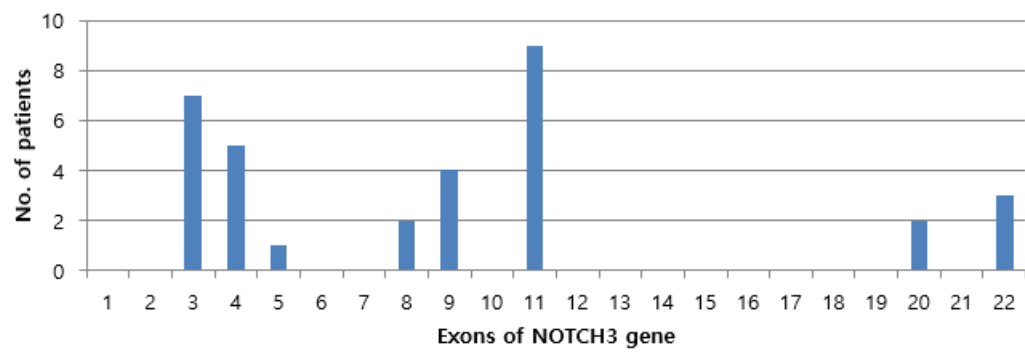

**Figure S1.** Exon distributions in NOTCH3 gene mutations.
